# Supplementary material for: Efficient immobilization of enzymes onto magnetic nanoparticles by DNA strand displacement: a stable and high-performance biocatalyst
Source: Royal Society of Chemistry journal article supplement (doi:10.1039/c7nj00284j), 2017-01-01
Supplement: c7nj00284j1.pdf [file c7nj00284j1.pdf]

## **Electronic Supplementary Information**

# **Efficient immobilization of enzymes onto magnetic nanoparticles by DNA strand displacement: a stable and high-performance biocatalyst**

Jiayi Song, Ping Su\*, Ye Yang and Yi Yang\*

*Beijing Key Laboratory of Environmentally Harmful Chemical Analysis, College of Science,  
Beijing University of Chemical Technology, Beijing 100029, P.R. China.*

**Fluorescein-labeled enzyme.** 5 mg of fluorescein isothiocyanate (FITC) were dissolved in 0.5 M carbonate buffer (pH 9.5) to give a final concentration of  $0.2 \text{ mg mL}^{-1}$  FITC, and 25 mg of ALP were dissolved in 0.5 M carbonate buffer (pH 9.5) to give a final concentration of  $1 \text{ mg mL}^{-1}$  ALP. 1 mL of the above FITC was added to 20 mL of above ALP, and the resulting solution was incubated at 300 rpm for 4 h in dark conditions. The excess FITC was removed through dialysis against deionized water for 48 h, and the deionized water was replaced with fresh one at 2 h intervals. Further, FITC-labeled ALP was prepared and used to prepare the FITC-labeled ALP-target DNA (24bases) conjugates as described above. The rhodamine B isothiocyanate (RhB)-labeled HRP-target DNA (44bases) conjugates were prepared in a similar manner.

**Table S1** Sequences of the DNA oligonucleotides used in the experiments.

| Name        |                 | Sequence (from 5' to 3')                                            |
|-------------|-----------------|---------------------------------------------------------------------|
| Capture DNA | C <sub>44</sub> | 5'-CTAGCTTGTCGTAATACCAGGGTCGTAGTAGTCAGTAGTAGTCA-NH <sub>2</sub> -3' |
| Target DNA  | T <sub>24</sub> | 5'-GACCCTGGTATTACGACAAGCTAG-SH-3'                                   |
|             | T <sub>44</sub> | 5'-TGACTACTACTGACTACTACGACCCTGGTATTACGACAAGCTAG-SH-3'               |

**Table S2** Domain sequences.

| domain | Sequence (from 5' to 3') |
|--------|--------------------------|
| a      | GACCCTGGTATTACGACAAGCTAG |
| a*     | CTAGCTTGTCGTAATACCAGGGTC |
| b      | TGACTACTACTGACTACTAC     |
| b*     | GTAGTAGTCAGTAGTAGTCA     |

**Table S3** Results of elemental analysis for magnetic materials.

| Compound                                         | N (%) | C (%) | H (%) |
|--------------------------------------------------|-------|-------|-------|
| Fe <sub>3</sub> O <sub>4</sub>                   | 0.03  | 2.15  | 0.39  |
| Fe <sub>3</sub> O <sub>4</sub> @SiO <sub>2</sub> | 0.24  | 2.17  | 0.54  |
| MNPs                                             | 0.40  | 3.11  | 0.71  |
| MNPs@DNA-HRP                                     | 0.47  | 3.99  | 0.98  |

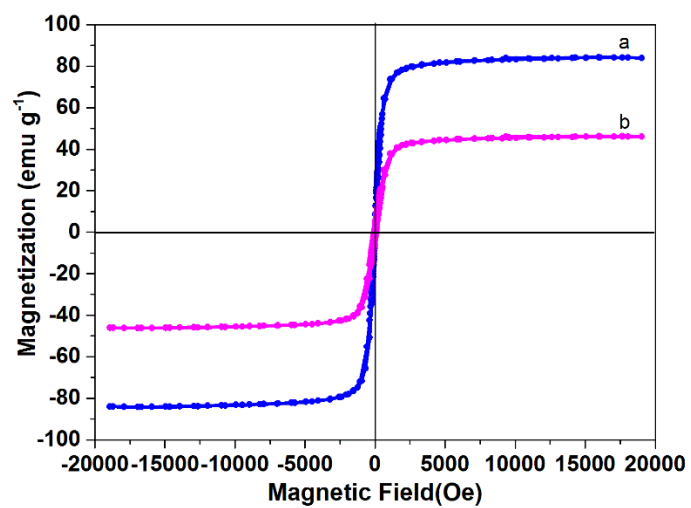

**Fig. S1** Magnetization curves of (a)  $\text{Fe}_3\text{O}_4$  and (b) MNPs@DNA-HRP.
